# Supplementary material for: Polyporus Umbellatus Protects Against Renal Fibrosis by Regulating Intrarenal Fatty Acyl Metabolites
Source: PubMed Central journal article supplement (PMC7934088; doi:10.3389/fphar.2021.633566), 2021-02-19
Supplement: image1.pdf [file image1.pdf]

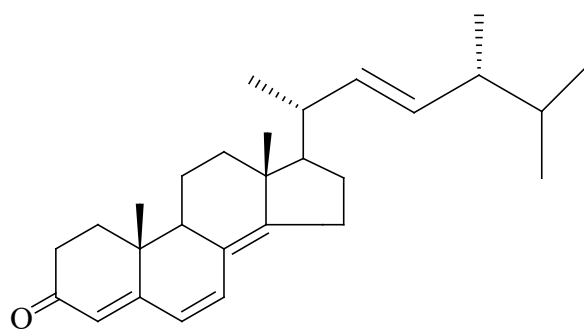

Figure S1 Chemical structure of ergone.
